# Supplementary material for: Impact of Atorvastatin on Skeletal Muscle Mitochondrial Activity, Locomotion and Axonal Excitability—Evidence from ApoE-/- Mice
Source: MDPI journal article supplement (doi:10.3390/ijms23105415), 2022-05-12

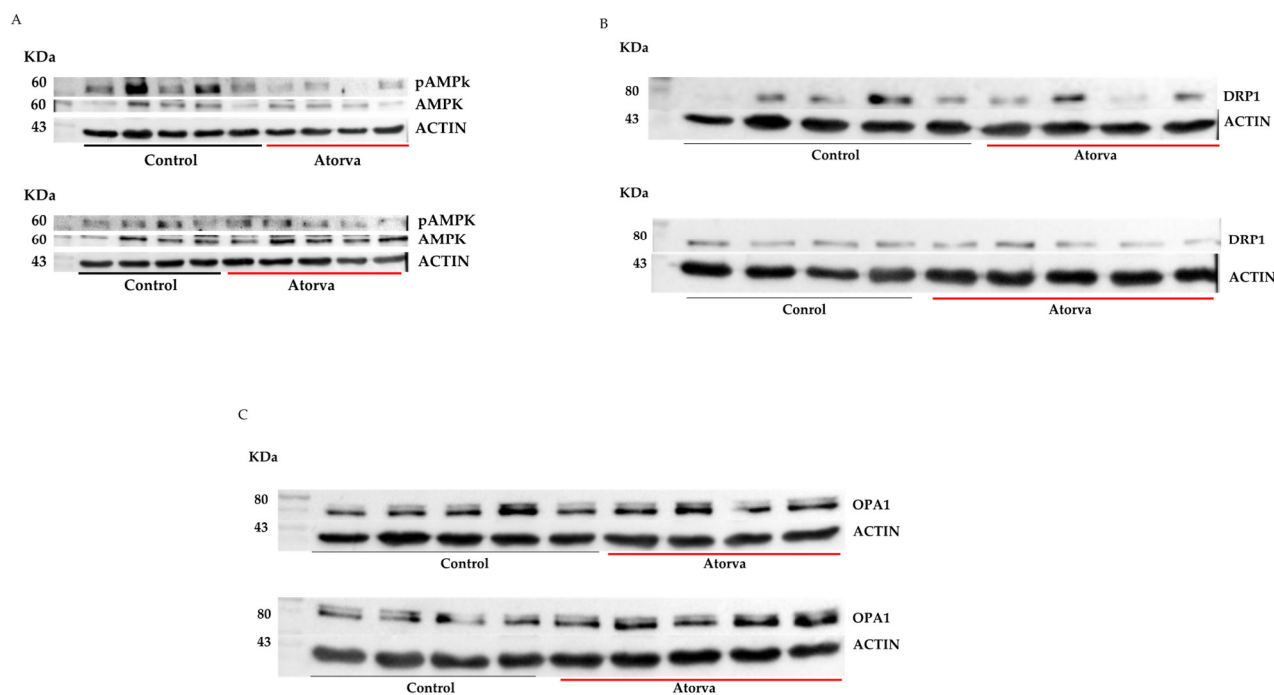

**Figure S1.** Western blot analyses of pAMPK/AMPK, DRP-1 and OPA-1. Protein expression of pAMPK/AMPK (A), DRP-1 (B) and OPA1 (C) in quadriceps of *ApoE*<sup>-/-</sup> mice fed HFHC and HFHC plus atorvastatin. Actin was used as a housekeeping. Proteins were extracted from 20 mg of tissue and Western blots analyses have been performed on 9 quadriceps in each group. AMPK, serine/threonine kinase AMP-activated protein kinase; DRP-1, dynamin related protein 1; HFHC, high-fat high cholesterol; OPA1, Optic atrophy 1. kDa, kilodalton; Control, high-fat high cholesterol diet; Atorva, high-fat high cholesterol diet plus atorvastatin.

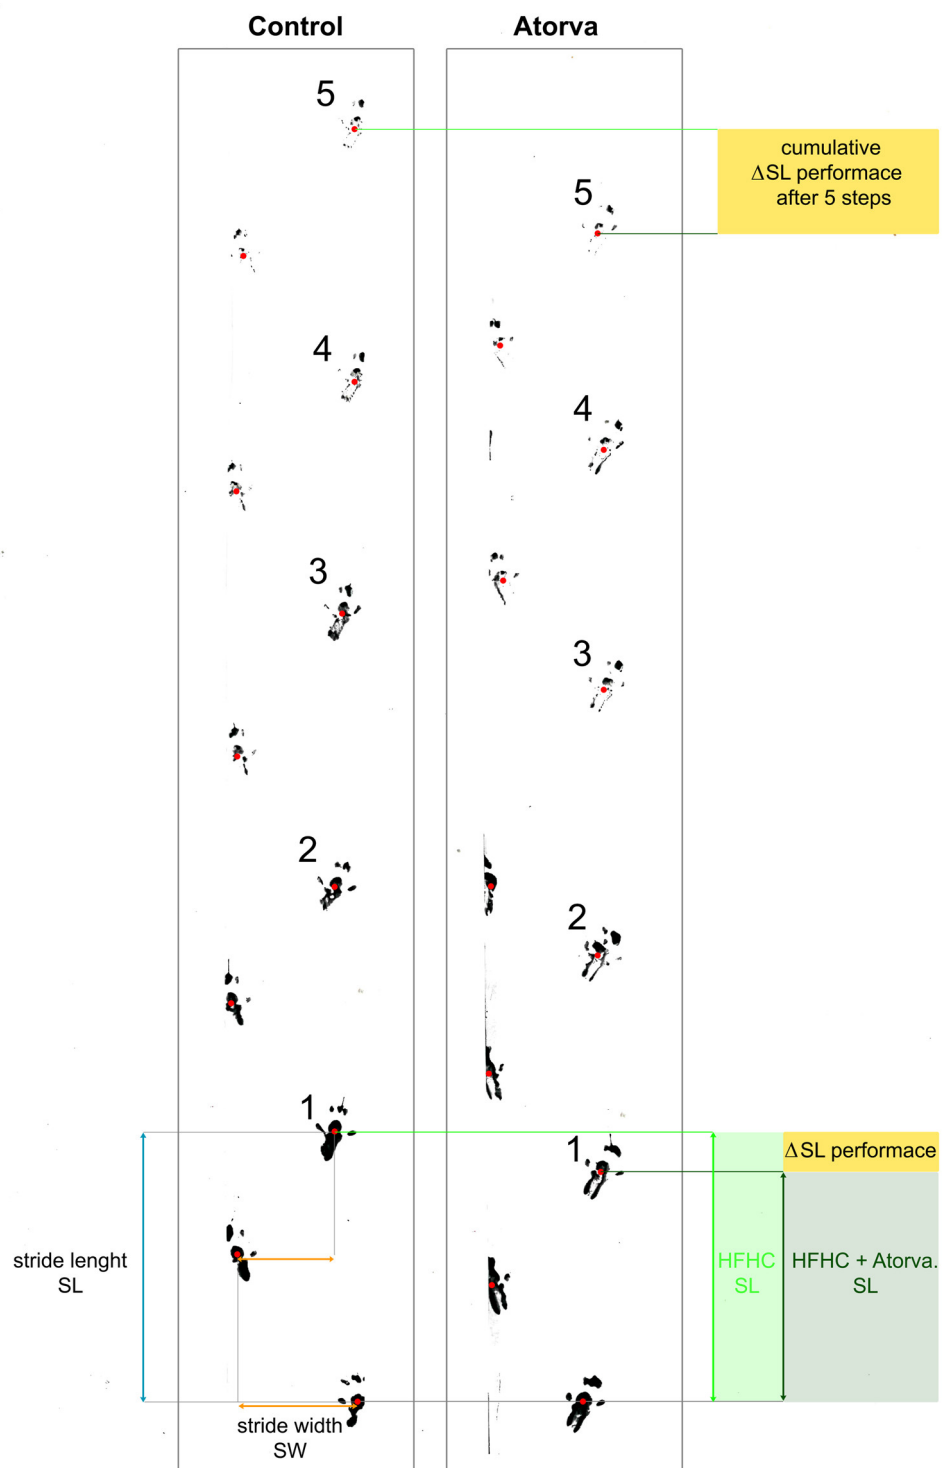

**Figure S2.** Walking analysis.

**Table S1. Diet composition.**

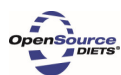

D12079B and D19031901

Formulated by:  
Research Diets, Inc.  
Sridhar Radhakrishnan  
March 2019

RD Western Diet to Match TD.88137

| Product #           | D12079B |      | D19031901      |         |
|---------------------|---------|------|----------------|---------|
|                     |         |      | Matching 88137 |         |
| %                   | gm      | kcal | gm             | kcal    |
| Protein             | 20      | 17   | 20             | 17      |
| Carbohydrate        | 50      | 43   | 50             | 43      |
| Fat                 | 21      | 40   | 21             | 40      |
| Total               |         | 100  |                | 100     |
| kcal/gm             | 4.7     |      | 4.7            |         |
| Ingredient          | gm      | kcal | gm             | kcal    |
| Casein              | 195     | 780  | 195            | 780     |
| DL-Methionine       | 3       | 12   | 3              | 12      |
| Corn Starch         | 50      | 200  | 150            | 600     |
| Maltodextrin 10     | 100     | 400  | 0              | 0       |
| Sucrose             | 341     | 1364 | 341.46         | 1365.84 |
| Cellulose, BW200    | 50      | 0    | 50             | 0       |
| Milk Fat, Anhydrous | 200     | 1800 | 210            | 1890    |
| Corn Oil            | 10      | 90   | 0              | 0       |
| Ethoxyquin          | 0.04    | 0    | 0.04           | 0       |
| Mineral Mix S10001  | 35      | 0    | 35             | 0       |
| Calcium Carbonate   | 4       | 0    | 4              | 0       |
| Vitamin Mix V10001  | 10      | 40   | 10             | 40      |
| Choline Bitartrate  | 2       | 0    | 2              | 0       |
| Cholesterol         | 1.5     | 0    | 1.5            | 0       |
| GSKG                | 0       | 0    | 0              | 0       |
| FD&C Yellow Dye #5  | 0       | 0    | 0              | 0       |
| FD&C Red Dye #40    | 0       | 0    | 0.05           | 0       |
| FD&C Blue Dye #41   | 0       | 0    | 0              | 0       |
| Total               | 1001.54 | 4686 | 1002.05        | 4688    |

Research Diets, Inc.  
20 Jules Lane  
New Brunswick, NJ 08901 USA  
info@researchdiets.com

D19031901.for

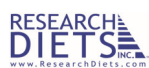

Supplement: s1 [file s1]
